# Supplementary material
Source: PubMed Central journal article supplement (PMC3269115)
Supplement: peds.2011-1828_peds.2011-1828SupplementaryData.pdf [file peds.2011-1828_peds.2011-1828SupplementaryData.pdf]

## Supplemental Information

**SUPPLEMENTAL TABLE 7** Performance of Drinking Quantity per Occasion to Identify Any Past-Year AUD Symptom

| Cut Point      | Age 12 |      | Age 13 |      | Age 14 |      | Age 15 |      | Age 16 |      | Age 17 |      | Age 18 |      |
|----------------|--------|------|--------|------|--------|------|--------|------|--------|------|--------|------|--------|------|
|                | Se     | Sp   |
| <b>Females</b> |        |      |        |      |        |      |        |      |        |      |        |      |        |      |
| ≥1 drink       | 1.00   | 0.95 | 1.00   | 0.88 | 1.00   | 0.78 | 1.00   | 0.68 | 1.00   | 0.61 | 1.00   | 0.54 | 1.00   | 0.50 |
| ≥2 drinks      | 0.31   | 0.99 | 0.37   | 0.99 | 0.48   | 0.96 | 0.58   | 0.94 | 0.64   | 0.90 | 0.68   | 0.87 | 0.77   | 0.82 |
| ≥3 drinks      | 0.22   | 1.00 | 0.23   | 0.99 | 0.36   | 0.98 | 0.46   | 0.96 | 0.53   | 0.94 | 0.59   | 0.91 | 0.67   | 0.87 |
| ≥4 drinks      | 0.13   | 1.00 | 0.18   | 1.00 | 0.27   | 0.99 | 0.35   | 0.97 | 0.43   | 0.96 | 0.47   | 0.94 | 0.54   | 0.92 |
| <b>Males</b>   |        |      |        |      |        |      |        |      |        |      |        |      |        |      |
| ≥1 drink       | 1.00   | 0.95 | 1.00   | 0.89 | 1.00   | 0.81 | 1.00   | 0.72 | 1.00   | 0.64 | 1.00   | 0.57 | 1.00   | 0.50 |
| ≥2 drinks      | 0.32   | 0.99 | 0.31   | 0.99 | 0.46   | 0.98 | 0.58   | 0.94 | 0.67   | 0.91 | 0.73   | 0.86 | 0.80   | 0.79 |
| ≥3 drinks      | 0.24   | 1.00 | 0.20   | 0.99 | 0.34   | 0.98 | 0.49   | 0.96 | 0.59   | 0.93 | 0.67   | 0.89 | 0.73   | 0.83 |
| ≥4 drinks      | 0.18   | 1.00 | 0.15   | 1.00 | 0.27   | 0.99 | 0.42   | 0.97 | 0.52   | 0.95 | 0.60   | 0.91 | 0.65   | 0.87 |

Analysis sample includes those who reported alcohol use in the past month.

**SUPPLEMENTAL TABLE 8** Performance of Drinking Quantity per Occasion to Identify Past-Year DSM-IV Alcohol Dependence

| Cut Point      | Age 12 |      | Age 13 |      | Age 14 |      | Age 15 |      | Age 16 |      | Age 17 |      | Age 18 |      |
|----------------|--------|------|--------|------|--------|------|--------|------|--------|------|--------|------|--------|------|
|                | Se     | Sp   |
| <b>Females</b> |        |      |        |      |        |      |        |      |        |      |        |      |        |      |
| ≥1 drink       | 1.00   | 0.94 | 1.00   | 0.85 | 1.00   | 0.73 | 1.00   | 0.60 | 1.00   | 0.51 | 1.00   | 0.44 | 1.00   | 0.37 |
| ≥2 drinks      | 0.45   | 0.99 | 0.47   | 0.97 | 0.61   | 0.94 | 0.68   | 0.88 | 0.74   | 0.82 | 0.79   | 0.77 | 0.88   | 0.69 |
| ≥3 drinks      | 0.40   | 1.00 | 0.39   | 0.99 | 0.47   | 0.96 | 0.57   | 0.91 | 0.69   | 0.87 | 0.72   | 0.82 | 0.80   | 0.76 |
| ≥4 drinks      | 0.07   | 1.00 | 0.32   | 0.99 | 0.37   | 0.97 | 0.48   | 0.94 | 0.61   | 0.90 | 0.62   | 0.87 | 0.68   | 0.83 |
| <b>Males</b>   |        |      |        |      |        |      |        |      |        |      |        |      |        |      |
| ≥1 drink       | 1.00   | 0.94 | 1.00   | 0.87 | 1.00   | 0.77 | 1.00   | 0.64 | 1.00   | 0.53 | 1.00   | 0.45 | 1.00   | 0.36 |
| ≥2 drinks      | 0.60   | 0.99 | 0.34   | 0.98 | 0.71   | 0.95 | 0.70   | 0.89 | 0.78   | 0.82 | 0.81   | 0.74 | 0.86   | 0.63 |
| ≥3 drinks      | 0.50   | 1.00 | 0.27   | 0.99 | 0.50   | 0.97 | 0.61   | 0.92 | 0.70   | 0.85 | 0.75   | 0.77 | 0.81   | 0.68 |
| ≥4 drinks      | 0.19   | 1.00 | 0.18   | 0.99 | 0.43   | 0.98 | 0.57   | 0.93 | 0.65   | 0.87 | 0.68   | 0.81 | 0.75   | 0.73 |

Analysis sample includes those who reported alcohol use in the past month.

**SUPPLEMENTAL TABLE 9** Performance of HED Frequency to Identify Any Past-Year AUD Symptom

| Cut Point      | Age 12 |      | Age 13 |      | Age 14 |      | Age 15 |      | Age 16 |      | Age 17 |      | Age 18 |      |
|----------------|--------|------|--------|------|--------|------|--------|------|--------|------|--------|------|--------|------|
|                | Se     | Sp   |
| <b>Females</b> |        |      |        |      |        |      |        |      |        |      |        |      |        |      |
| ≥1 d           | 0.30   | 0.99 | 0.35   | 0.99 | 0.45   | 0.97 | 0.52   | 0.95 | 0.56   | 0.93 | 0.60   | 0.91 | 0.67   | 0.88 |
| ≥2 d           | 0.14   | 1.00 | 0.22   | 1.00 | 0.29   | 0.99 | 0.36   | 0.98 | 0.40   | 0.97 | 0.44   | 0.96 | 0.52   | 0.94 |
| ≥3 d           | 0.09   | 1.00 | 0.13   | 1.00 | 0.19   | 0.99 | 0.24   | 0.99 | 0.27   | 0.98 | 0.31   | 0.98 | 0.40   | 0.97 |
| ≥4 d           | 0.07   | 1.00 | 0.09   | 1.00 | 0.14   | 1.00 | 0.17   | 1.00 | 0.20   | 0.99 | 0.25   | 0.99 | 0.31   | 0.98 |
| <b>Males</b>   |        |      |        |      |        |      |        |      |        |      |        |      |        |      |
| ≥1 d           | 0.37   | 0.99 | 0.33   | 0.99 | 0.47   | 0.97 | 0.55   | 0.95 | 0.66   | 0.92 | 0.71   | 0.88 | 0.76   | 0.83 |
| ≥2 d           | 0.24   | 1.00 | 0.21   | 1.00 | 0.32   | 0.99 | 0.40   | 0.98 | 0.50   | 0.96 | 0.58   | 0.93 | 0.64   | 0.90 |
| ≥3 d           | 0.14   | 1.00 | 0.13   | 1.00 | 0.21   | 0.99 | 0.28   | 0.99 | 0.37   | 0.98 | 0.45   | 0.96 | 0.51   | 0.94 |
| ≥4 d           | 0.08   | 1.00 | 0.09   | 1.00 | 0.14   | 1.00 | 0.21   | 0.99 | 0.29   | 0.99 | 0.37   | 0.97 | 0.43   | 0.96 |

HED frequency is the number of days of 5+ drinks per occasion in the past 30 days. Analysis sample includes those who reported alcohol use in the past month. d, day(s).

**SUPPLEMENTAL TABLE 10** Performance of HED Frequency to Identify Past-Year DSM-IV Alcohol Dependence

| Cut Point      | Age 12 |      | Age 13 |      | Age 14 |      | Age 15 |      | Age 16 |      | Age 17 |      | Age 18 |      |
|----------------|--------|------|--------|------|--------|------|--------|------|--------|------|--------|------|--------|------|
|                | Se     | Sp   |
| <b>Females</b> |        |      |        |      |        |      |        |      |        |      |        |      |        |      |
| ≥ 1 d          | 0.44   | 0.99 | 0.51   | 0.97 | 0.59   | 0.94 | 0.66   | 0.90 | 0.71   | 0.86 | 0.76   | 0.82 | 0.83   | 0.76 |
| ≥ 2 d          | 0.33   | 1.00 | 0.37   | 0.99 | 0.49   | 0.97 | 0.49   | 0.94 | 0.58   | 0.91 | 0.63   | 0.89 | 0.74   | 0.85 |
| ≥ 3 d          | 0.25   | 1.00 | 0.28   | 0.99 | 0.37   | 0.98 | 0.37   | 0.97 | 0.46   | 0.95 | 0.48   | 0.93 | 0.61   | 0.90 |
| ≥ 4 d          | 0.25   | 1.00 | 0.19   | 1.00 | 0.29   | 0.99 | 0.29   | 0.98 | 0.37   | 0.97 | 0.39   | 0.95 | 0.51   | 0.93 |
| <b>Males</b>   |        |      |        |      |        |      |        |      |        |      |        |      |        |      |
| ≥ 1 d          | 0.65   | 0.99 | 0.42   | 0.98 | 0.71   | 0.95 | 0.72   | 0.90 | 0.76   | 0.83 | 0.81   | 0.75 | 0.88   | 0.67 |
| ≥ 2 d          | 0.42   | 1.00 | 0.30   | 0.99 | 0.55   | 0.97 | 0.59   | 0.94 | 0.66   | 0.89 | 0.71   | 0.83 | 0.77   | 0.76 |
| ≥ 3 d          | 0.22   | 1.00 | 0.21   | 0.99 | 0.34   | 0.98 | 0.48   | 0.96 | 0.55   | 0.92 | 0.60   | 0.88 | 0.64   | 0.82 |
| ≥ 4 d          | 0.06   | 1.00 | 0.12   | 1.00 | 0.29   | 0.99 | 0.42   | 0.97 | 0.47   | 0.94 | 0.50   | 0.91 | 0.55   | 0.86 |

HED frequency is the number of days of 5+ drinks per occasion in the past 30 days. Analysis sample includes those who reported alcohol use in the past month. d, day(s).
